# Supplementary material for: Genetic Approaches to Increase Arabinoxylan and β-Glucan Content in Wheat
Source: MDPI journal article supplement (doi:10.3390/plants12183216), 2023-09-08
Supplement: s1 [file s1]

Table S1.  $\beta$ -glucan content of wheat species from selected publications from 1983 to 2020. Quantification was performed using the enzymatic method essentially as described by McCleary and Glennie-Holmes (1985) unless otherwise indicated.

| Sample and source                       | Ploidy                    | $\beta$ -glucan<br>(%dw) | Details                                                                         | Reference |
|-----------------------------------------|---------------------------|--------------------------|---------------------------------------------------------------------------------|-----------|
| <b>WHOLEMEAL</b>                        |                           |                          |                                                                                 |           |
| <i>T. monococcum</i>                    | Diploid                   | 0.30                     |                                                                                 | [159]     |
| <i>T. durum</i>                         | Tetraploid                | 0.35                     |                                                                                 | [159]     |
| <i>T. dicoccum</i>                      | Tetraploid                | 0.35                     |                                                                                 | [159]     |
| <i>T. dicoccum</i>                      | Tetraploid                | 0.38                     | Mean of 5 varieties                                                             | [69]      |
| Chinese elite wheat lines               | Hexaploid                 | 0.42                     | Mean value of range (27 lines)                                                  | [135]     |
| <i>Triticum</i> spp                     | Tetraploid                | 0.42                     | Mean of 8 subspecies over 2 years                                               | [114]     |
| <i>T. aestivum</i>                      | Hexaploid                 | 0.48                     | Mean of 3 varieties; calcoflour method                                          | [171]     |
| <i>Triticum</i> spp                     | Hexaploid &<br>Tetraploid | 0.48                     |                                                                                 | [79]      |
| <i>Triticum</i> spp                     | Tetraploid                | 0.48                     | Mean of all varieties over 2 years of sampling                                  | [94]      |
| <i>Triticum</i> spp                     | Diploid                   | 0.48                     | Mean of all varieties over 2 years of sampling                                  | [94]      |
| Tetraploid wheat lines                  | Tetraploid                | 0.49                     | Mean value of range (88 lines)                                                  | [135]     |
| <i>Durum wheat</i>                      | Tetraploid                | 0.49                     | cv. Svevo                                                                       | [88]      |
| <i>T. durum</i>                         | Tetraploid                | 0.53                     | Mean of 5 varieties                                                             | [69]      |
| <i>T. aestivum</i>                      | Hexaploid                 | 0.6                      |                                                                                 | [172]     |
| <i>T. aestivum</i>                      | Hexaploid                 | 0.6                      |                                                                                 | [89]      |
| <i>T. aestivum</i> subsp. <i>Spelta</i> | Hexaploid                 | 0.64                     | Mean of 5 varieties, 3 growing seasons, conventional and organic growth systems | [173]     |
| <i>T. spelta</i>                        | Hexaploid                 | 0.65                     |                                                                                 | [159]     |
| <i>T. aestivum</i> subsp. <i>Spelta</i> | Hexaploid                 | 0.65                     | Mean of 90 genotypes over 3 years                                               | [174]     |

|                                           |            |      |                                                                                 |                                |       |
|-------------------------------------------|------------|------|---------------------------------------------------------------------------------|--------------------------------|-------|
| Triticale                                 | Hexaploid  | 0.66 | Mean value of range                                                             | [135]                          |       |
| <i>T. aestivum</i>                        | Hexaploid  | 0.68 | Mean of winter and spring varieties                                             | [159]                          |       |
| <i>T. aestivum</i>                        | Hexaploid  | 0.7  | Mean of values at two growth temperatures                                       | [144]                          |       |
| <i>T. aestivum</i>                        | Hexaploid  | 0.7  | Mean value of range (338 lines)                                                 | [135]                          |       |
| <i>T. aestivum</i> subsp. <i>aestivum</i> | Hexaploid  | 0.74 | Mean of 5 varieties, 3 growing seasons, conventional and organic growth systems | [173]                          |       |
| <i>T. aestivum</i>                        | Hexaploid  | 0.75 | Mean of 29 varieties                                                            | [69]                           |       |
| Wheat-barley addition                     | 7Ds-7HL    | 0.75 | Mean of values at two growth temperatures                                       | [144]                          |       |
| CIMMYT synthetics                         | Hexaploid  | 0.76 | Mean value of range (22 lines)                                                  | [135]                          |       |
| <i>T. aestivum</i>                        | Hexaploid  | 0.8  | Mean of 10 lines                                                                | [175]                          |       |
| <i>Triticum</i> spp                       | Hexaploid  | 0.83 | Mean of all varieties over 2 years of sampling                                  | [94]                           |       |
| <i>T. aestivum</i>                        | Hexaploid  | 0.84 | Mean over 3 years                                                               | [146]                          |       |
| Wheat-barley addition                     | 7Bs-7HL    | 0.85 | Mean of values at two growth temperatures                                       | [144]                          |       |
| Wheat-barley addition                     | 7As-7HL    | 0.95 | Mean of values at two growth temperatures                                       | [144]                          |       |
| Wheat-barley addition                     | 7H         | 0.96 | Mean of values at two growth temperatures                                       | [144]                          |       |
| Wheat-barley addition                     |            | 1.02 | Mean value of range (6 lines)                                                   | [135]                          |       |
| <i>Ae. crassa</i>                         | Hexaploid  | 1.04 | Mean of all varieties over 2 years of sampling                                  | [94]                           |       |
| Primitive wheat                           | Diploid    | &    | 1.06                                                                            | Mean value of range (35 lines) | [135] |
|                                           | Tetraploid |      |                                                                                 |                                |       |
| <i>Aegilops</i> spp                       | Diploid    | 2.26 | Mean of all varieties over 2 years of sampling                                  | [94]                           |       |
| <i>Ae. biuncialis</i>                     | Tetraploid | 3.67 | Mean of 83 accessions over 2 years of sampling                                  | [95]                           |       |
| <i>Aegilops</i> spp                       | Tetraploid | 4.53 | Mean of all varieties over 2 years of sampling                                  | [94]                           |       |
| ENDOSPERM                                 |            |      |                                                                                 |                                |       |
| <i>T. aestivum</i>                        | Hexaploid  | 0.2  | Endosperm flour                                                                 | [176]                          |       |
| ALEURONE                                  |            |      |                                                                                 |                                |       |
| <i>T. aestivum</i>                        | Hexaploid  | 4.55 | Mean of 2 different preparations                                                | [130]                          |       |

**BRAN***T. aestivum*

Hexaploid

2.15

Red wheat

[93]

*T. aestivum*

Hexaploid

2.45

White wheat; mean of "bran 300" and "bran powder 50"

[93]

*T. aestivum*

Hexaploid

2.9

[130]
